# Supplementary material
Source: MDPI journal article supplement (https://www.mdpi.com/2073-4395/13/3/681)
Supplement: s1 [file s1]

**Table S1.** Characteristics of the grassland survey sites.

| Farm | Coordinates    | Layer | Soil texture |             |             | Soil reaction | OM  | K                   | P                   | N                  |
|------|----------------|-------|--------------|-------------|-------------|---------------|-----|---------------------|---------------------|--------------------|
|      |                |       | <i>Sand</i>  | <i>Silt</i> | <i>Clay</i> |               |     |                     |                     |                    |
|      |                | (cm)  | %            | %           | %           | pH            | %   | mg kg <sup>-1</sup> | mg kg <sup>-1</sup> | g kg <sup>-1</sup> |
| 1    | 44.661, 10.444 | 0-15  | 12           | 49          | 39          | 7.37          | 3.0 | 384                 | 226                 | 2.0                |
|      |                | 15-30 | 9            | 54          | 37          | 7.27          | 2.6 | 357                 | 194                 | 2.1                |
|      |                | 30-60 | 11           | 50          | 39          | 7.64          | 1.0 | 161                 | 27                  | 0.9                |
|      | 44.659, 10.442 | 0-15  | 10           | 52          | 38          | 7.56          | 5.8 | 724                 | 154                 | 3.1                |
|      |                | 15-30 | 9            | 52          | 39          | 7.76          | 1.8 | 671                 | 45                  | 1.0                |
|      |                | 30-60 | 11           | 52          | 37          | 7.83          | 1.0 | 582                 | 32                  | 0.6                |
|      | 44.658, 10.443 | 0-15  | 11           | 52          | 37          | 7.34          | 2.9 | 380                 | 236                 | 2.2                |
|      |                | 15-30 | 10           | 50          | 40          | 7.30          | 2.2 | 340                 | 170                 | 2.1                |
|      |                | 30-60 | 11           | 49          | 40          | 7.58          | 1.0 | 199                 | 30                  | 0.9                |
| 2    | 44.710, 10.492 | 0-15  | 6            | 57          | 37          | 7.34          | 5.0 | 689                 | 285                 | 3.1                |
|      |                | 15-30 | 9            | 55          | 37          | 7.77          | 4.7 | 226                 | 156                 | 2.8                |
|      |                | 30-60 | 11           | 52          | 37          | 8.00          | 1.4 | 223                 | 54                  | 0.9                |
|      | 44.708, 10.490 | 0-15  | 9            | 57          | 34          | 7.77          | 4.7 | 900                 | 276                 | 2.9                |
|      |                | 15-30 | 24           | 39          | 37          | 7.88          | 3.4 | 641                 | 200                 | 1.8                |
|      |                | 30-60 | 11           | 52          | 37          | 7.78          | 3.8 | 818                 | 271                 | 2.4                |
|      | 44.707, 10.490 | 0-15  | 7            | 55          | 38          | 7.70          | 4.8 | 890                 | 270                 | 2.0                |
|      |                | 15-30 | 8            | 52          | 40          | 7.80          | 3.7 | 640                 | 211                 | 1.8                |
|      |                | 30-60 | 12           | 52          | 36          | 7.70          | 1.9 | 790                 | 272                 | 1.1                |
| 3    | 44.653, 10.450 | 0-15  | 17           | 65          | 18          | 7.08          | 6.7 | 650                 | 442                 | 4.2                |
|      |                | 15-30 | 12           | 57          | 31          | 7.31          | 2.1 | 449                 | 83                  | 1.6                |
|      |                | 30-60 | 17           | 52          | 31          | 7.53          | 1.1 | 246                 | 31                  | 0.9                |
|      | 44.653, 10.449 | 0-15  | 8            | 56          | 36          | 7.02          | 6.4 | 648                 | 440                 | 4.1                |
|      |                | 15-30 | 8            | 51          | 41          | 7.32          | 2.1 | 440                 | 90                  | 1.5                |
|      |                | 30-60 | 12           | 50          | 38          | 7.48          | 1.2 | 216                 | 32                  | 0.8                |
|      | 44.654, 10.449 | 0-15  | 7            | 55          | 38          | 7.12          | 6.1 | 658                 | 450                 | 3.9                |
|      |                | 15-30 | 8            | 53          | 39          | 7.34          | 2.1 | 460                 | 90                  | 1.5                |
|      |                | 30-60 | 13           | 53          | 34          | 7.54          | 1.1 | 230                 | 29                  | 0.9                |
| 4    | 44.755, 10.490 | 0-15  | 11           | 52          | 37          | 7.64          | 8.0 | 385                 | 382                 | 4.8                |
|      |                | 15-30 | 16           | 42          | 42          | 7.91          | 1.6 | 228                 | 57                  | 0.9                |
|      |                | 30-60 | 11           | 47          | 42          | 7.82          | 0.7 | 201                 | 28                  | 0.4                |
|      | 44.755, 10.491 | 0-15  | 11           | 52          | 37          | 7.64          | 6.7 | 370                 | 380                 | 4.7                |
|      |                | 15-30 | 10           | 50          | 40          | 7.90          | 1.8 | 230                 | 43                  | 1.1                |
|      |                | 30-60 | 11           | 49          | 40          | 7.79          | 0.9 | 190                 | 29                  | 0.6                |
|      | 44.758, 10.489 | 0-15  | 7            | 56          | 37          | 7.70          | 6.4 | 370                 | 380                 | 4.6                |
|      |                | 15-30 | 8            | 53          | 39          | 7.90          | 1.5 | 230                 | 58                  | 0.9                |
|      |                | 30-60 | 14           | 53          | 33          | 7.78          | 0.7 | 216                 | 30                  | 0.3                |
| 5    | 44.665, 10.517 | 0-15  | 11           | 52          | 37          | 6.73          | 2.4 | 206                 | 148                 | 1.4                |
|      |                | 15-30 | 4            | 62          | 34          | 7.03          | 1.9 | 208                 | 166                 | 1.5                |
|      |                | 30-60 | 9            | 57          | 34          | 7.33          | 1.1 | 144                 | 93                  | 0.9                |
|      | 44.666, 10.517 | 0-15  | 22           | 65          | 13          | 7.32          | 9.4 | 326                 | 429                 | 5.6                |
|      |                | 15-30 | 9            | 57          | 34          | 7.26          | 5.9 | 251                 | 209                 | 3.9                |
|      |                | 30-60 | 11           | 52          | 37          | 7.46          | 2.9 | 155                 | 172                 | 2.1                |
|      | 44.666, 10.518 | 0-15  | 20           | 66          | 14          | 7.30          | 9.1 | 329                 | 414                 | 4.9                |
|      |                | 15-30 | 10           | 55          | 35          | 7.28          | 5.8 | 263                 | 249                 | 3.8                |
|      |                | 30-60 | 10           | 54          | 36          | 7.42          | 2.8 | 201                 | 160                 | 1.9                |

OM = organic matter, K = exchangeable K, P = assimilable P, N = total N.

**Table S2.** Chemical characteristics of the raw livestock manures.

| Parameters                            | Farmyard manure |       |       |       |       |
|---------------------------------------|-----------------|-------|-------|-------|-------|
|                                       | 1               | 2     | 3     | 4     | 5     |
| TS (% WB)                             | 17.89           | 15.55 | 16.84 | 17.15 | 18.30 |
| Total N (% WB)                        | 2.27            | 2.77  | 2.51  | 2.30  | 2.40  |
| N-NH <sub>4</sub> <sup>+</sup> (% WB) | 32.41           | 23.49 | 21.93 | 23.00 | 29.06 |

TS = total solids, WB = wet basis, N = nitrogen, N-NH<sub>4</sub><sup>+</sup> = ammoniacal N.

**Table S3.** Statistical analysis of Near-Infrared Reflectance Spectroscopy data with details on the interaction Farm x Year.

| Item                                  | Harvest | Farms             |                   |                   |                   |                   | Year             |       | Farm  | Year x Farm |
|---------------------------------------|---------|-------------------|-------------------|-------------------|-------------------|-------------------|------------------|-------|-------|-------------|
|                                       |         | 1                 | 2                 | 3                 | 4                 | 5                 |                  |       |       |             |
|                                       |         |                   |                   |                   |                   |                   | mean             | p     | p     | p           |
| Yield<br>(Mg of DM ha <sup>-1</sup> ) | 2017    | 5.9 <sup>g</sup>  | 3.7 <sup>h</sup>  | 7.2 <sup>e</sup>  | 8.1 <sup>d</sup>  | 10.9 <sup>b</sup> | 7.2 <sup>b</sup> | 0.001 | 0.001 | 0.001       |
|                                       | 2018    | 6.4 <sup>f</sup>  | 6.7 <sup>f</sup>  | 10.0 <sup>c</sup> | 10.3 <sup>c</sup> | 12.6 <sup>a</sup> | 9.2 <sup>a</sup> |       |       |             |
| Plants per<br>transept (number)       | 2017    | 102 <sup>bc</sup> | 79 <sup>cde</sup> | 73 <sup>de</sup>  | 112 <sup>ab</sup> | 71 <sup>de</sup>  | 88               | n.s.  | 0.001 | 0.020       |
|                                       | 2018    | 131               | 93 <sup>bcd</sup> | 59 <sup>e</sup>   | 93 <sup>bcd</sup> | 62 <sup>e</sup>   | 88               |       |       |             |
| SolP (% of DM)                        | 2017    | 3.8 <sup>b</sup>  | 3.9 <sup>b</sup>  | 4.3 <sup>ab</sup> | 2.3 <sup>c</sup>  | 4.6 <sup>ab</sup> | 3.8 <sup>b</sup> | 0.003 | n.s.  | 0.041       |
|                                       | 2018    | 4.8 <sup>ab</sup> | 5.5 <sup>a</sup>  | 4.1 <sup>ab</sup> | 4.6 <sup>ab</sup> | 4.5 <sup>ab</sup> | 4.7 <sup>a</sup> |       |       |             |

SolP = soluble protein. Different letters within each column indicate significant differences (within a variable) between treatments and/or year according to Duncan's range test ( $p < 0.05$ ). n.s. = not significant.

**Table S4.** Botanical composition of individual plant species in monitored permanent grassland.

| Poaceae                                                                                                                                                                                                                                                                                                                                                             | Fabaceae                                                                             | Other species                                                                                                                                                                                                                                                                                                                                                                                                                                                                                                                                                                                                                                                                                                                                                                                                                                  |
|---------------------------------------------------------------------------------------------------------------------------------------------------------------------------------------------------------------------------------------------------------------------------------------------------------------------------------------------------------------------|--------------------------------------------------------------------------------------|------------------------------------------------------------------------------------------------------------------------------------------------------------------------------------------------------------------------------------------------------------------------------------------------------------------------------------------------------------------------------------------------------------------------------------------------------------------------------------------------------------------------------------------------------------------------------------------------------------------------------------------------------------------------------------------------------------------------------------------------------------------------------------------------------------------------------------------------|
| <i>Agropyron</i> spp.<br><i>Alopecurus pratensis</i> L.<br><i>Alopecurus utriculatus</i> (L.) Pers.<br><i>Bromus hordeaceus</i> L.<br><i>Dactylis glomerata</i> L.<br><i>Festuca arundinacea</i> Schreb.<br><i>Festuca pratensis</i> Huds.<br><i>Lolium multiflorum</i> Lam.<br><i>Lolium perenne</i> L.<br><i>Poa sylvicola</i> Guss.<br><i>Hordeum murimum</i> L. | <i>Trifolium pratense</i> L.<br><i>Trifolium repens</i> L.<br><i>Vicia sativa</i> L. | <i>Achillea millefolium</i> L.<br><i>Calepina irregularis</i> (Asso) Thell.<br><i>Capsella bursa-pastoris</i> (L.) Medik.<br><i>Cerastium</i> spp.<br><i>Cirsium arvense</i> (L.) Scop.<br><i>Convolvulus arvensis</i> L.<br><i>Crepis biennis</i> L.<br><i>Dianthus caryophyllus</i> L.<br><i>Galium</i> spp.<br><i>Geranium dissectum</i> L.<br><i>Lamium</i> spp.<br><i>Lychnis flos-cuculi</i> L.<br><i>Malva sylvestris</i> L.<br><i>Ornithogalum umbellatum</i> L.<br><i>Plantago lanceolata</i> L.<br><i>Plantago major</i> L.<br><i>Potentilla</i> spp.<br><i>Ranunculus</i> spp.<br><i>Rumex acetosa</i> L.<br><i>Silene vulgaris</i> (Moench) Garcke<br><i>Sinapis arvensis</i> L.<br><i>Stellaria media</i> (L.) Vill.<br><i>Taraxacum officinale</i> (L.) Weber<br><i>Tragopogon pratensis</i> L.<br><i>Veronica persica</i> Poir. |
